# Supplementary material for: A New Method to Determine Antioxidant Activities of Biofilms Using a pH Indicator (Resazurin) Model System
Source: MDPI journal article supplement (doi:10.3390/molecules28052092), 2023-02-23

Figure S-1. The change of a value of AES-R system covered by BHA gelatin films at different concentration

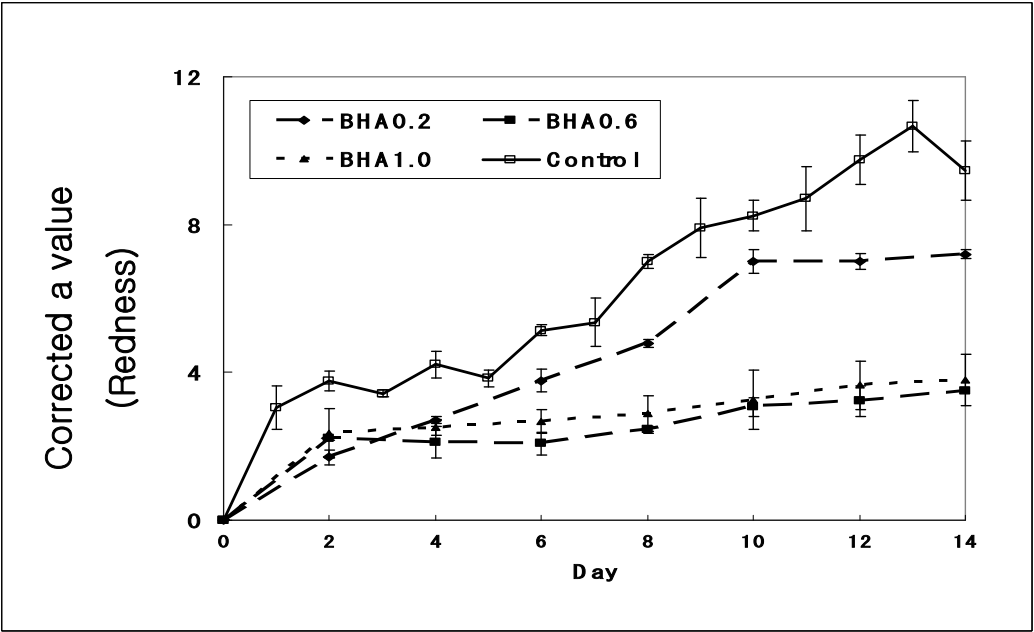

Figure S-2. The change of a value of AES-R system covered by ascorbic acid gelatin films at different concentration

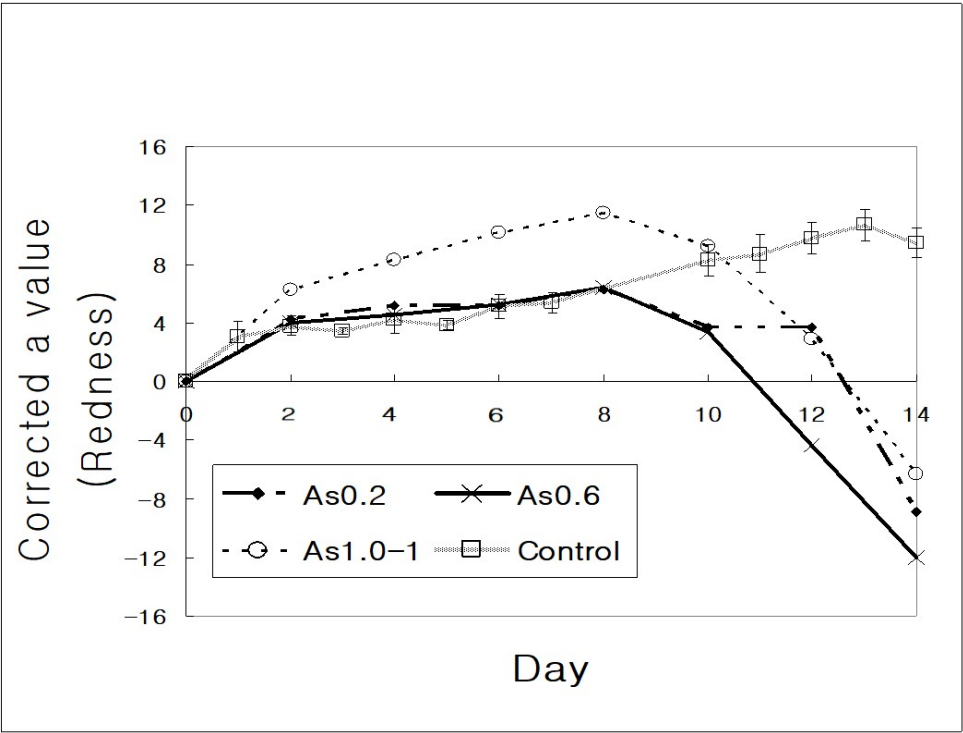

Figure S-3. The change of a value of AES-R system covered by phytic acid gelatin films at different concentration

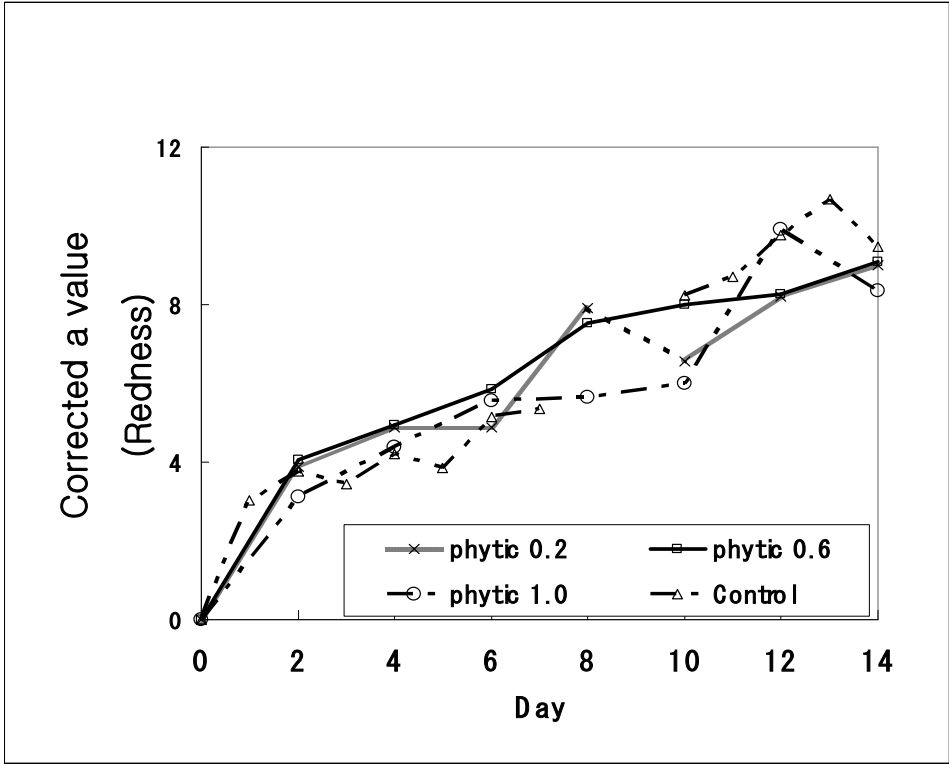

Supplement: s1 [file s1]
